# Supplementary material
Source: MDPI journal article supplement (https://www.mdpi.com/2073-4441/16/6/889)
Supplement: s1 [file s1]

## Supplementary Materials

### Nitrate

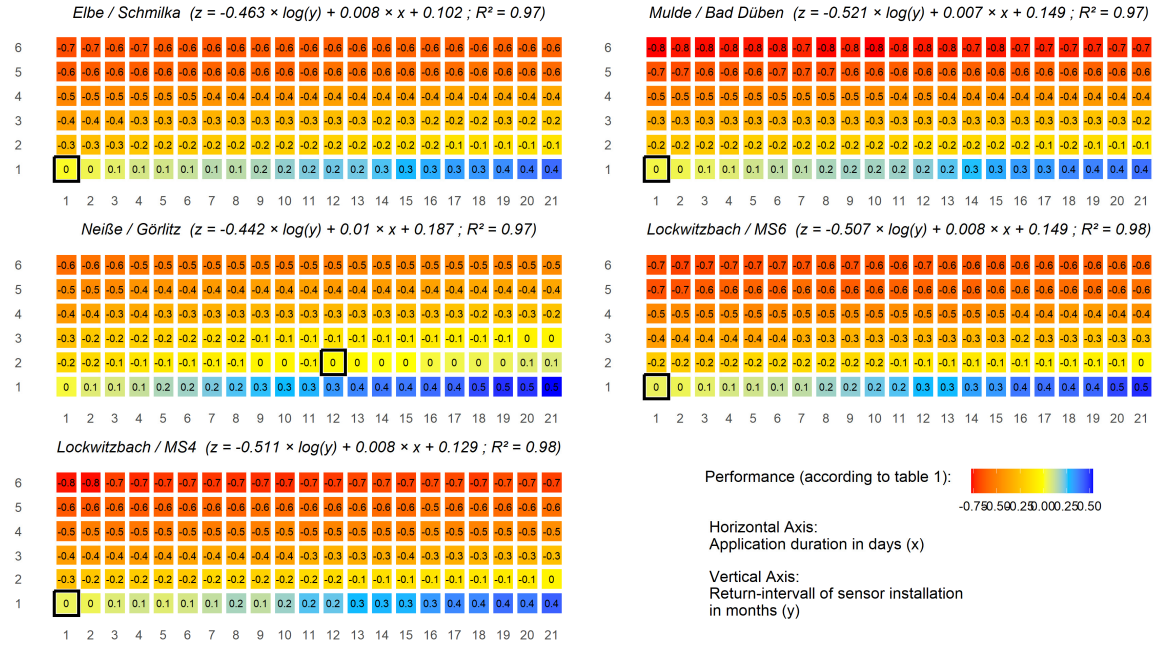

Figure S1: Performance between STOM and grab sampling at weekend and 9 am to 5 pm for nitrogen-nitrate

### Chloride

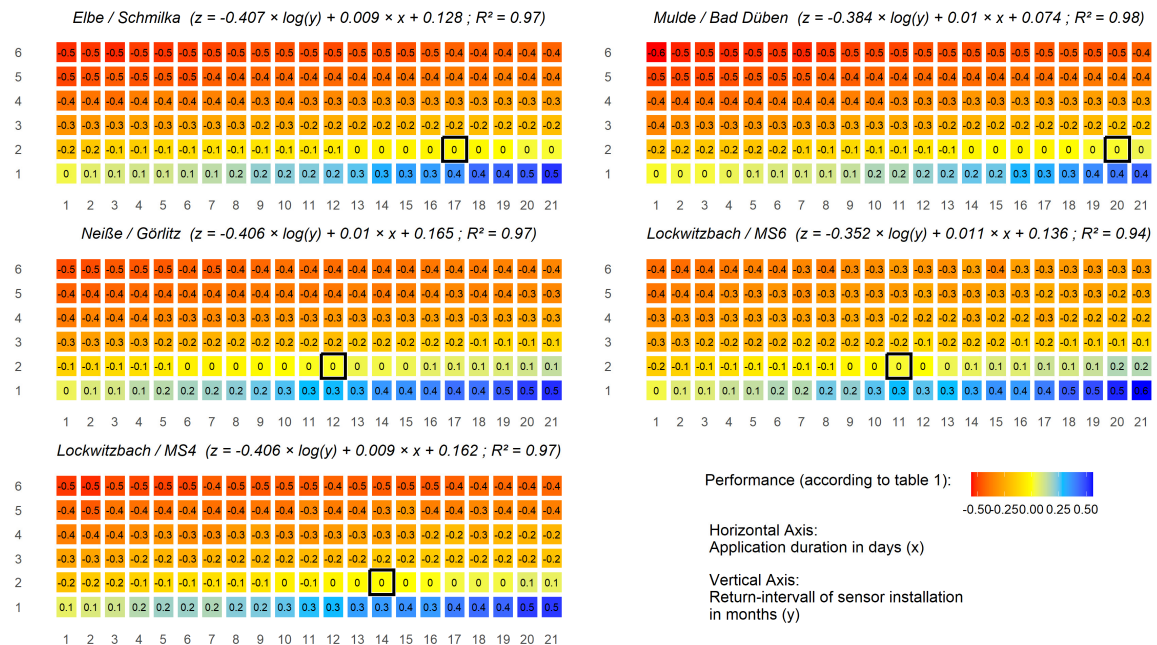

Figure S2: Performance between STOM and grab sampling at weekend and 9 am to 5 pm for chloride

## Oxygen

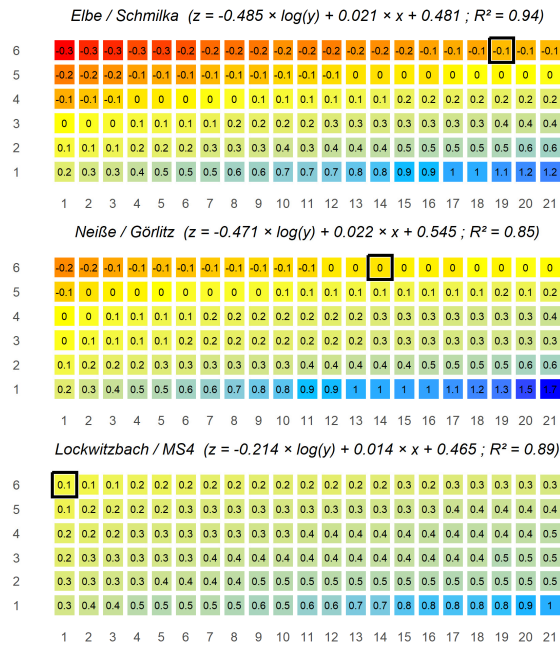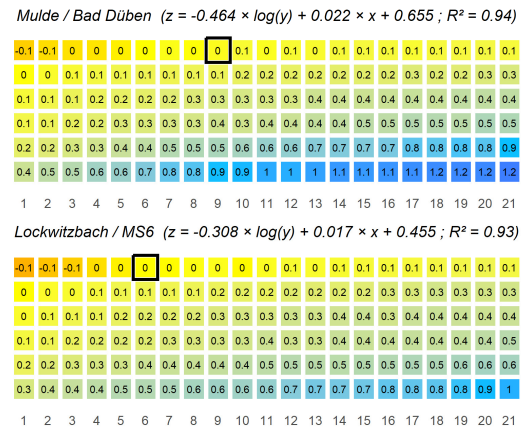

Performance (according to table 1):

Horizontal Axis:  
Application duration in days (x)

Vertical Axis:  
Return-interval of sensor installation  
in months (y)

Figure S3: Performance between STOM and grab sampling at weekend and 9 am to 5 pm for dissolved oxygen

Grab sampling during the whole day (0-24h):

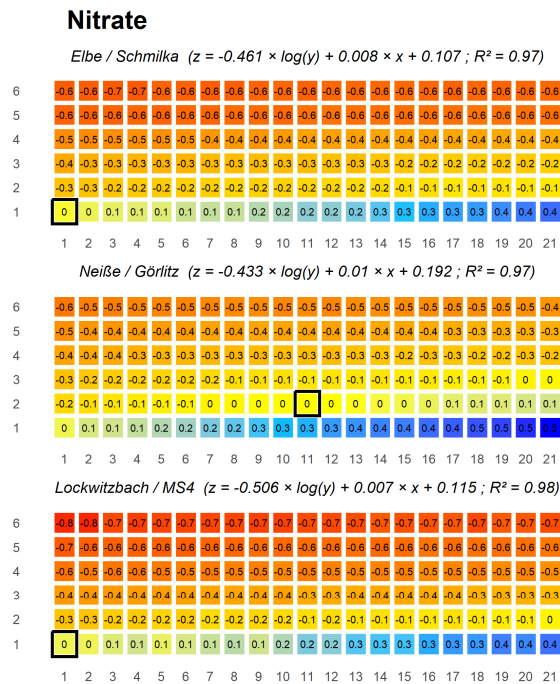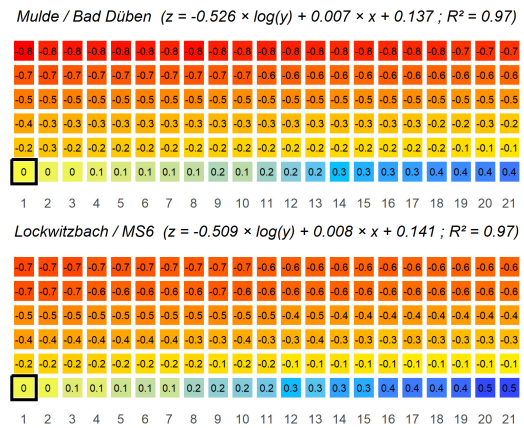

Performance (according to table 1):

Horizontal Axis:  
Application duration in days (x)

Vertical Axis:  
Return-interval of sensor installation  
in months (y)

Figure S4: Performance between STOM and Grab sampling during the whole day (0-24h) for nitrate nitrogen

## Chloride

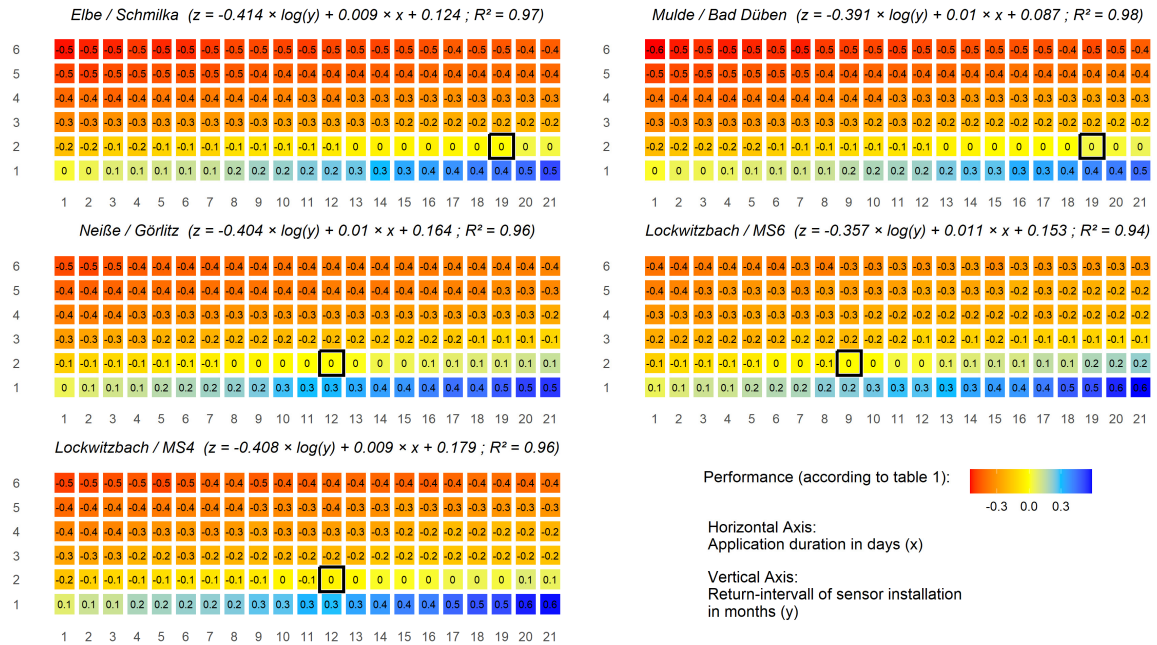

Figure S5: Performance between STOM and Grab sampling during the whole day (0-24h) for chloride

## Oxygen

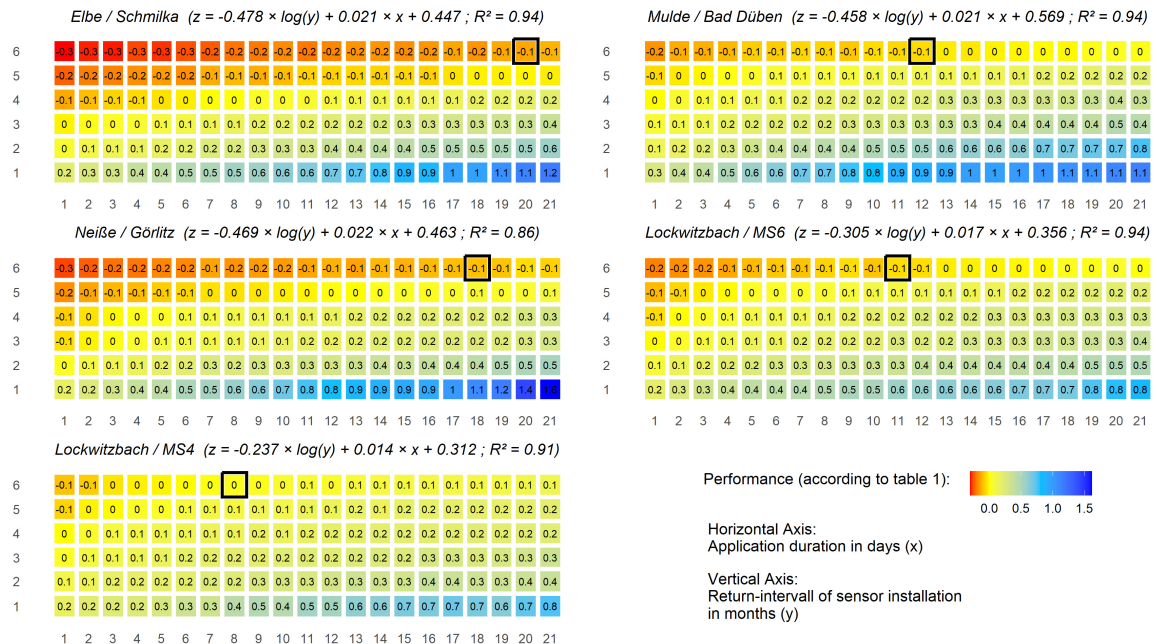

Figure S6: Performance between STOM and Grab sampling during the whole day (0-24h) for dissolved oxygen

## Nitrate

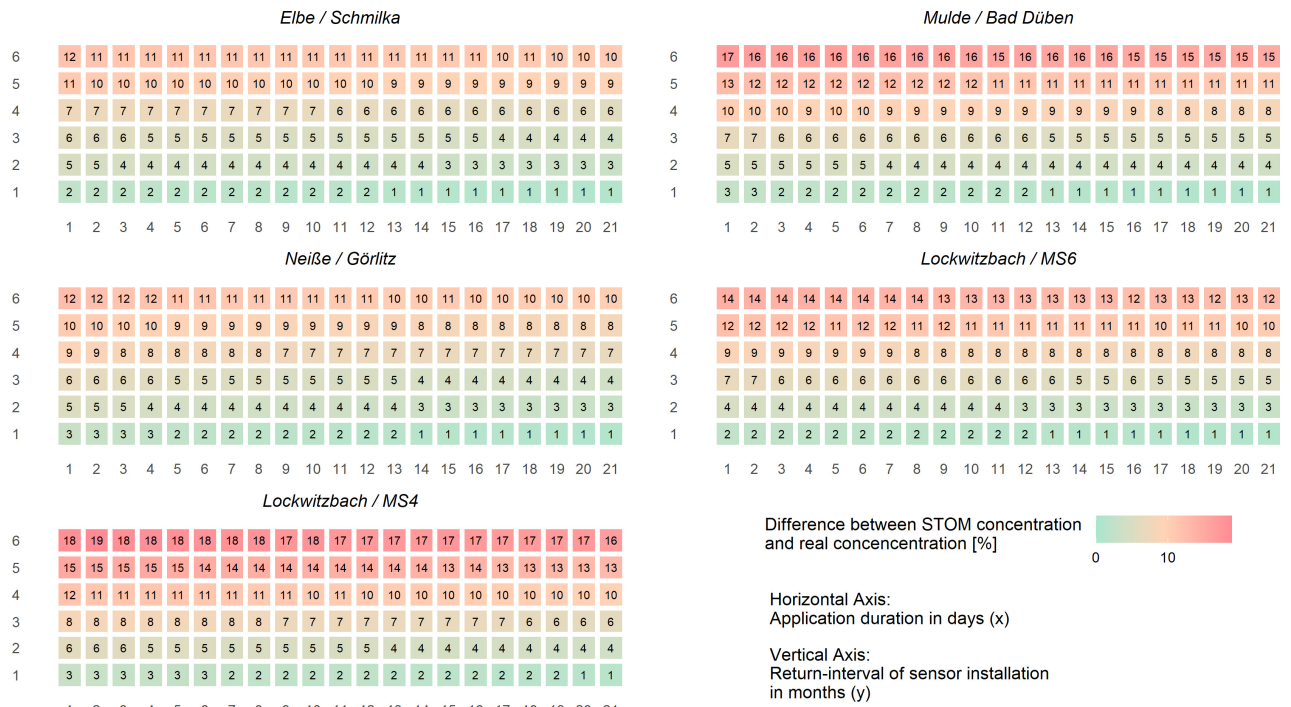

Figure S7: Difference between STOM concentration and real concentration for nitrogen-nitrate

## Chloride

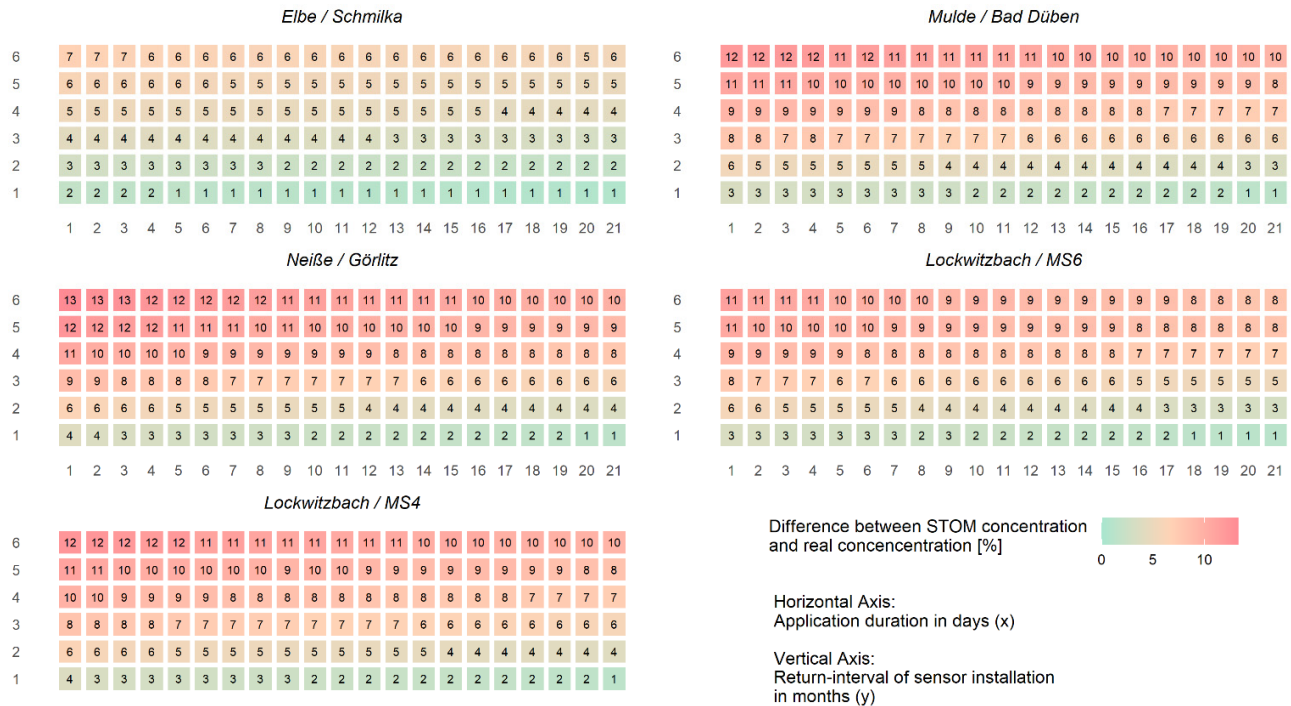

Figure S8: Difference between STOM concentration and real concentration for chloride



## Oxygen

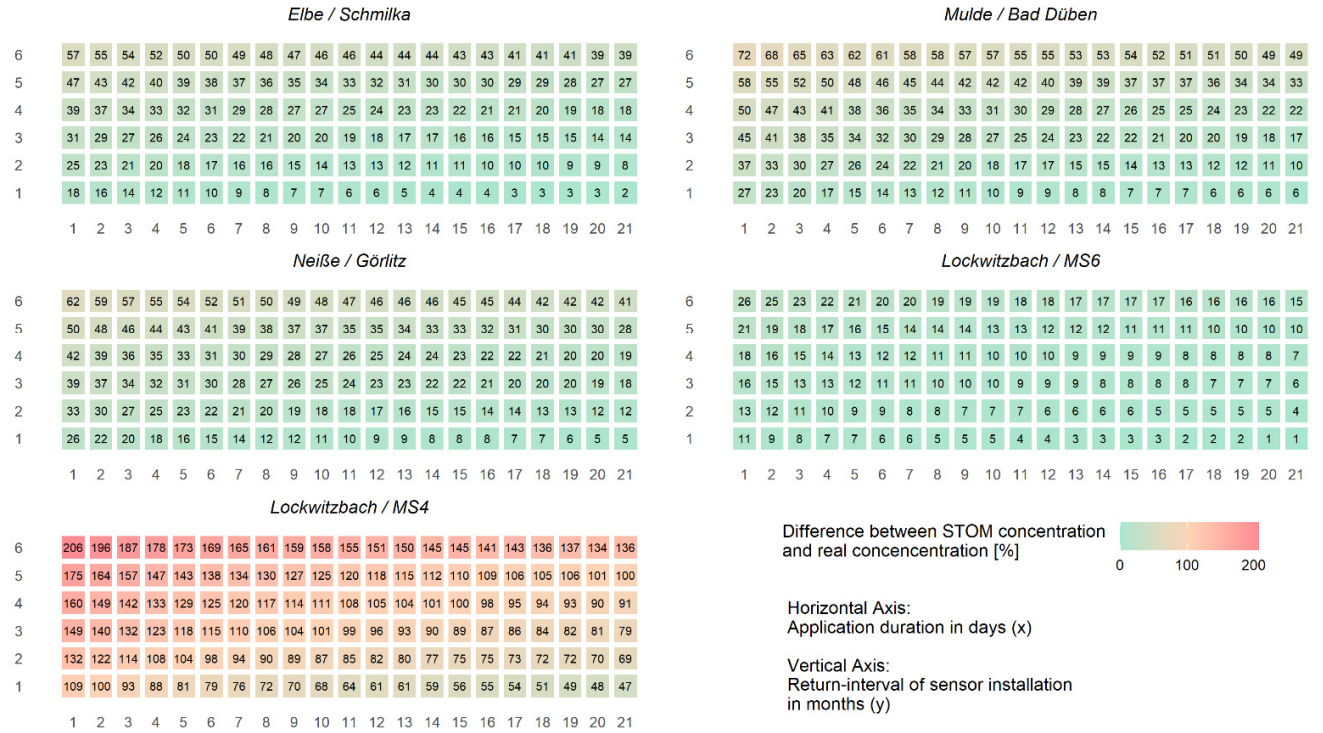

Figure S9: Difference between STOM concentration and real concentration for oxygen

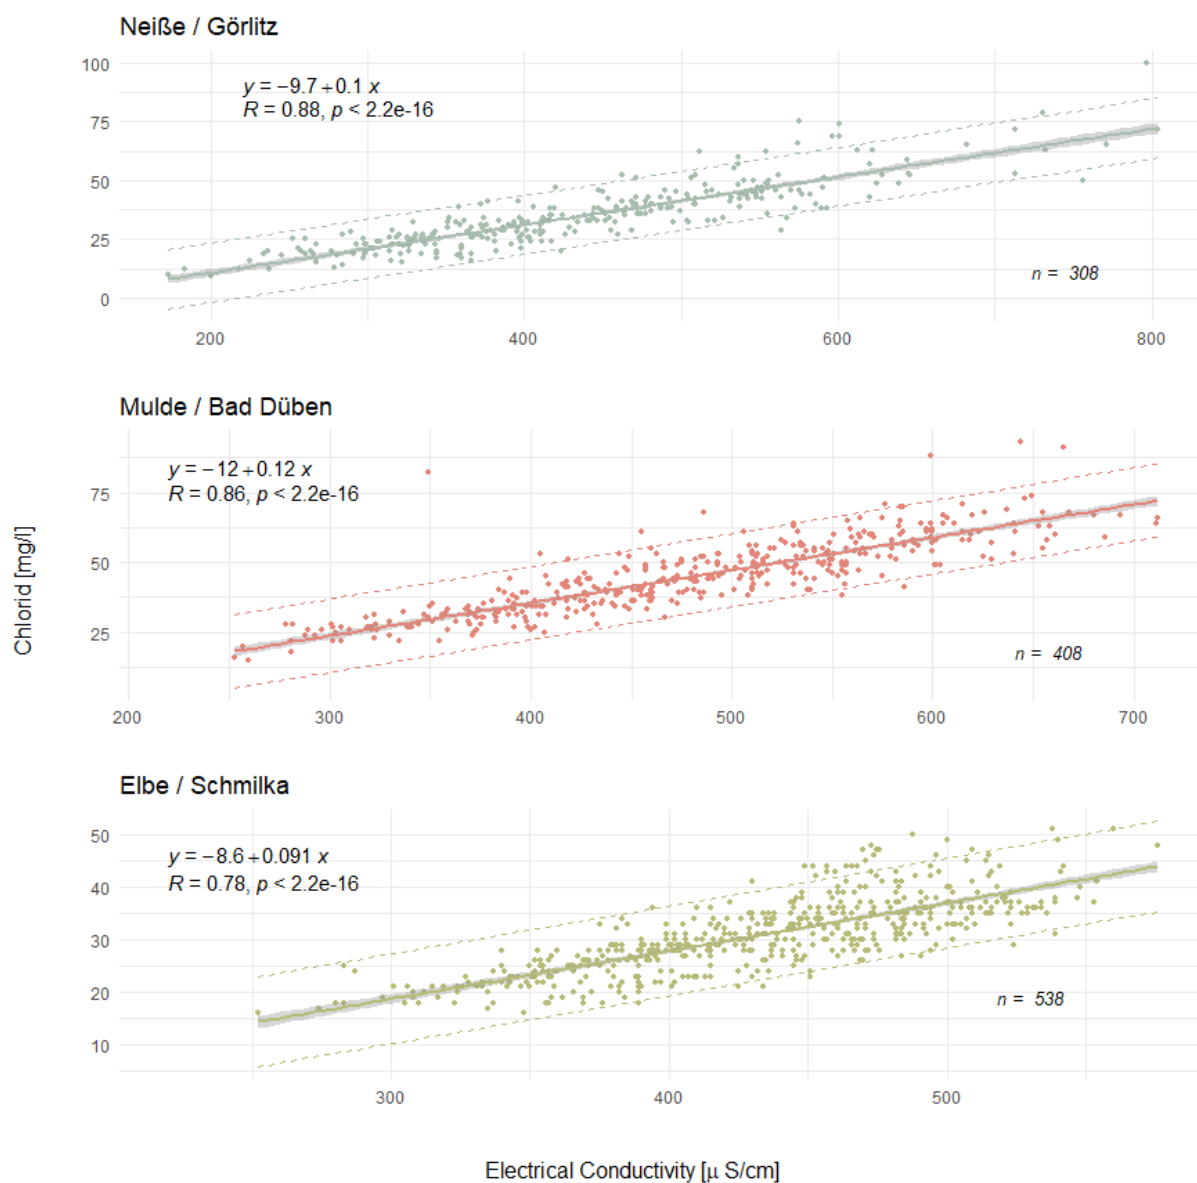

Figure S10: Linear relation between electrical conductivity and chloride concentration at Mule / Bad Döben, Lausitzer Neiße / Görlitz and Elbe / Schmilka. Shaded area: 95%-confidence interval, dashed lines: Prediction interval

Table S1: Result of 500 simulation runs of grab sampling according to OGeV rules with standard deviation. Sampling frequency were varied between once to every month to two times per year.

|                   | Grab sampling every month  |                    |                            | Grab sampling every fourth month |                    |                            |
|-------------------|----------------------------|--------------------|----------------------------|----------------------------------|--------------------|----------------------------|
|                   | Nitrate-Nitrogen<br>[mg/l] | Chloride<br>[mg/l] | Dissolved<br>Oxygen [mg/l] | Nitrate-Nitrogen<br>[mg/l]       | Chloride<br>[mg/l] | Dissolved<br>Oxygen [mg/l] |
| Mulde / Bad Döben | $4.2 \pm 0.1$              | $41 \pm 1.7$       | $11.1 \pm 0.3$             | $4.2 \pm 0.5$                    | $40.9 \pm 4.7$     | $11.1 \pm 0.8$             |
| Elbe / Schmilka   | $3.3 \pm 0.1$              | $30.2 \pm 0.7$     | $10.4 \pm 0.3$             | $3.3 \pm 0.3$                    | $30.2 \pm 2.1$     | $10.4 \pm 1$               |

| Neiße / Görlitz                  | 2.8 ± 0.1                  | 35.3 ± 1.8         | 10.5 ± 0.2                      | 2.7 ± 0.3                  | 35.3 ± 4.8         | 10.5 ± 0.7                 |
|----------------------------------|----------------------------|--------------------|---------------------------------|----------------------------|--------------------|----------------------------|
| Lockwitzbach /MS6                | 7 ± 0.2                    | 43 ± 2.2           | 11.2 ± 0.2                      | 7 ± 0.8                    | 42.9 ± 5.5         | 11.1 ± 0.7                 |
| Lockwitzbach /MS4                | 6.3 ± 0.3                  | 41.9 ± 2.2         | 12.6 ± 0.5                      | 6.4 ± 1                    | 42 ± 5.9           | 12.5 ± 1.1                 |
| Grab sampling every second month |                            |                    | Grab sampling every fifth month |                            |                    |                            |
|                                  | Nitrate-Nitrogen<br>[mg/l] | Chloride<br>[mg/l] | Dissolved<br>Oxygen [mg/l]      | Nitrate-Nitrogen<br>[mg/l] | Chloride<br>[mg/l] | Dissolved<br>Oxygen [mg/l] |
| Mulde / Bad Düben                | 4.2 ± 0.3                  | 40.9 ± 2.9         | 11.1 ± 0.5                      | 4.2 ± 0.6                  | 40.9 ± 5.5         | 11 ± 1.1                   |
| Elbe / Schmilka                  | 3.3 ± 0.2                  | 30.2 ± 1.2         | 10.4 ± 0.5                      | 3.4 ± 0.4                  | 30.3 ± 2.4         | 10.4 ± 1.2                 |
| Neiße / Görlitz                  | 2.8 ± 0.2                  | 35.3 ± 2.9         | 10.5 ± 0.4                      | 2.7 ± 0.3                  | 35.5 ± 5.6         | 10.5 ± 0.9                 |
| Lockwitzbach /MS6                | 7 ± 0.4                    | 43.1 ± 3.5         | 11.2 ± 0.4                      | 7 ± 0.9                    | 42.6 ± 6.9         | 11.1 ± 0.8                 |
| Lockwitzbach /MS4                | 6.3 ± 0.5                  | 41.9 ± 3.7         | 12.6 ± 0.8                      | 6.3 ± 1.1                  | 41.5 ± 6.6         | 12.5 ± 1.4                 |
| Grab sampling every third month  |                            |                    | Grab sampling every sixth month |                            |                    |                            |
|                                  | Nitrate-Nitrogen<br>[mg/l] | Chloride<br>[mg/l] | Dissolved Oxygen<br>[mg/l]      | Nitrate-Nitrogen<br>[mg/l] | Chloride<br>[mg/l] | Dissolved Oxygen<br>[mg/l] |
| Mulde / Bad Düben                | 4.2 ± 0.4                  | 41 ± 4             | 11.1 ± 0.7                      | 4.2 ± 0.9                  | 40.9 ± 6.4         | 11.1 ± 1.2                 |
| Elbe / Schmilka                  | 3.3 ± 0.2                  | 30.2 ± 1.7         | 10.4 ± 0.7                      | 3.3 ± 0.5                  | 30.2 ± 2.6         | 10.4 ± 1.4                 |
| Neiße / Görlitz                  | 2.8 ± 0.2                  | 35.3 ± 3.9         | 10.5 ± 0.6                      | 2.7 ± 0.4                  | 35.3 ± 6           | 10.5 ± 1.4                 |
| Lockwitzbach /MS6                | 7 ± 0.6                    | 42.9 ± 4.5         | 11.1 ± 0.6                      | 7 ± 1.2                    | 42.8 ± 6.7         | 11.1 ± 1.1                 |
| Lockwitzbach /MS4                | 6.4 ± 0.7                  | 41.8 ± 4.7         | 12.5 ± 1.1                      | 6.4 ± 1.5                  | 41.9 ± 7.9         | 12.5 ± 1.6                 |

Table S2: Monitoring costs for STOM in Euro per year

|                              | Return interval in months |       |      |      |      |      |      |
|------------------------------|---------------------------|-------|------|------|------|------|------|
|                              | 1                         | 2     | 3    | 4    | 5    | 6    |      |
| Application duration in days | 1                         | 8011  | 5077 | 4099 | 3610 | 3316 | 3121 |
|                              | 2                         | 8011  | 5077 | 4099 | 3610 | 3316 | 3121 |
|                              | 3                         | 8011  | 5077 | 4099 | 3610 | 3316 | 3121 |
|                              | 4                         | 8011  | 5077 | 4099 | 3610 | 3316 | 3121 |
|                              | 5                         | 8011  | 5077 | 4099 | 3610 | 3316 | 3121 |
|                              | 6                         | 8011  | 5077 | 4099 | 3610 | 3316 | 3121 |
|                              | 7                         | 8011  | 5077 | 4099 | 3610 | 3316 | 3121 |
|                              | 8                         | 8011  | 5077 | 4099 | 3610 | 3316 | 3121 |
|                              | 9                         | 10154 | 5077 | 4099 | 3610 | 3316 | 3121 |
|                              | 10                        | 10154 | 5077 | 4099 | 3610 | 3316 | 3121 |
|                              | 11                        | 10154 | 5077 | 4099 | 3610 | 3316 | 3121 |
|                              | 12                        | 10154 | 5077 | 4099 | 3610 | 3316 | 3121 |
|                              | 13                        | 10154 | 5077 | 4099 | 3610 | 3316 | 3121 |
|                              | 14                        | 10154 | 5077 | 4099 | 3610 | 3316 | 3121 |
|                              | 15                        | 12297 | 5077 | 4099 | 3610 | 3316 | 3121 |
|                              | 16                        | 12297 | 5077 | 4099 | 3610 | 3316 | 3121 |
|                              | 17                        | 12297 | 5077 | 4099 | 3610 | 3316 | 3121 |
|                              | 18                        | 12297 | 5077 | 4099 | 3610 | 3316 | 3121 |

|    |       |      |      |      |      |      |
|----|-------|------|------|------|------|------|
| 19 | 12297 | 5077 | 4099 | 3610 | 3316 | 3121 |
| 20 | 12297 | 5077 | 4099 | 3610 | 3316 | 3121 |
| 21 | 14439 | 5077 | 4099 | 3610 | 3316 | 3121 |
